# Supplementary material for: Inactivation of the UL37 Deamidase Enhances Virus Replication and Spread of the HSV-1(VC2) Oncolytic Vaccine Strain and Secretion of GM-CSF
Source: MDPI journal article supplement (doi:10.3390/v15020367), 2023-01-27
Supplement: s1 [file s1]

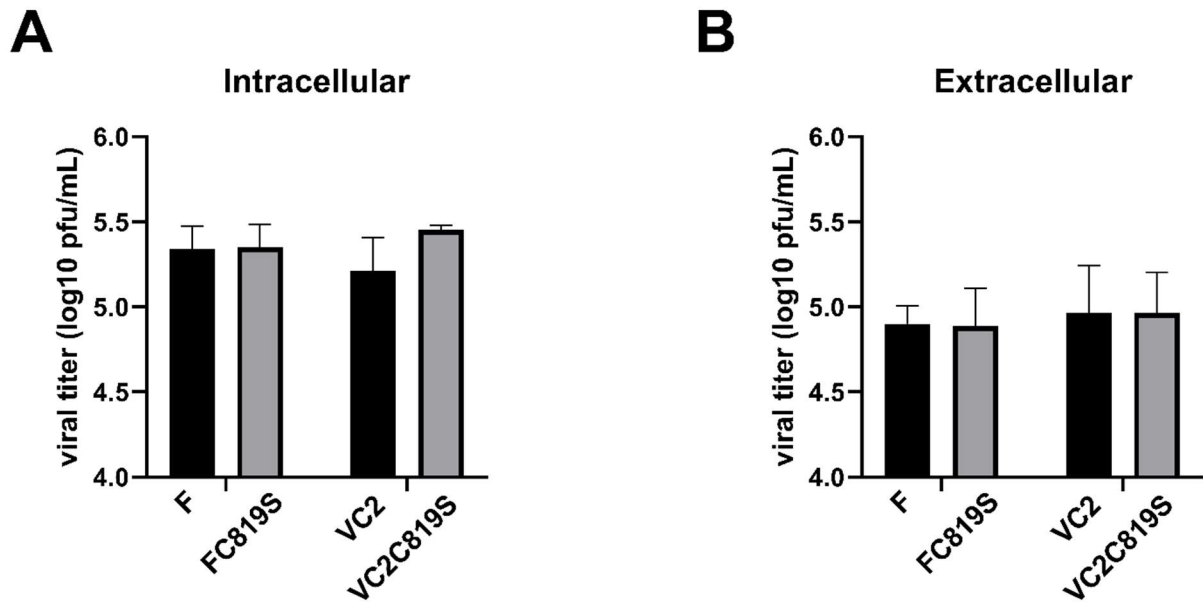

**Figure S1.** Intracellular and extracellular virion production. Cells were infected at an MOI of 1.0 and incubated for 24 hours post-infection. Infected cell media (A) and infected cell lysates (B) were collected and titrated on Vero cells. Error bars represent the standard error of the mean based on three experimental replicates.

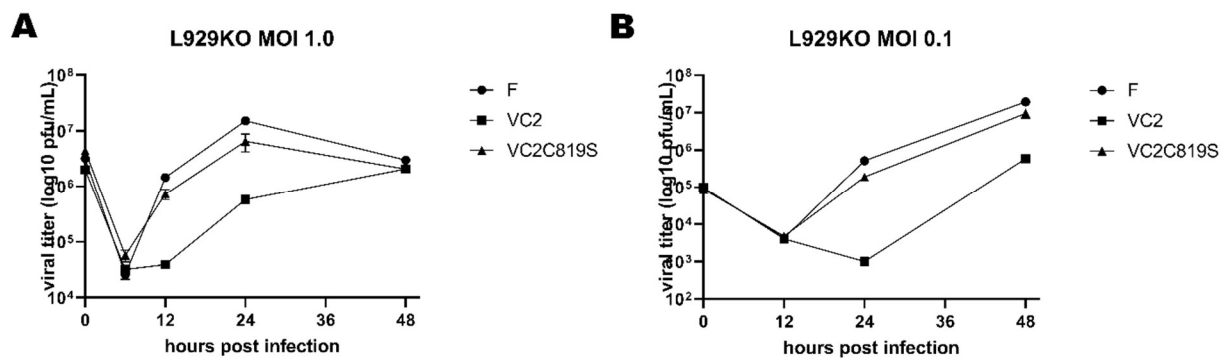

**Figure S2.** Replication kinetics of wild-type and recombinant viruses in L929KO cells. Growth curve of F, VC2, and VC2C819S at an MOI of 0.1 (A) and 1.0 (B) on L929 cGAS<sup>-/-</sup> cells. Whole lysates were collected at 0, 6, 12, 24, and 48 hpi and titrated on Vero.

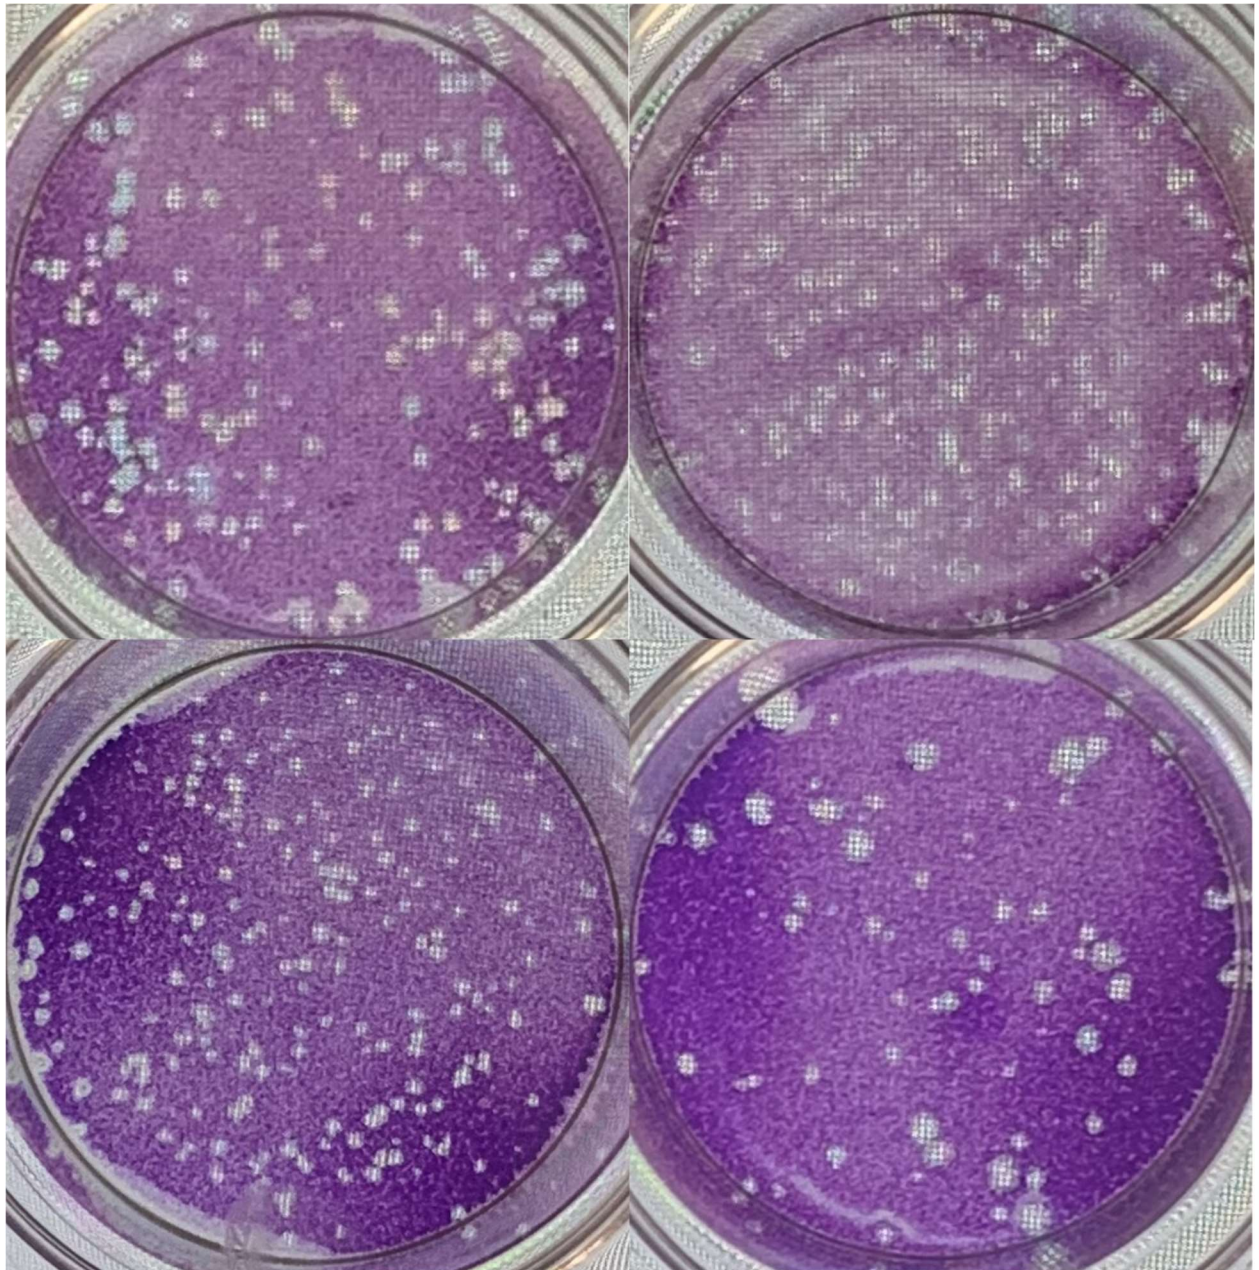

**Figure S3.** Plaque morphology on Vero cells. F (A), FC819S (B), VC2 (C), and VC2C819S (D) were serial diluted into a monolayer of Vero cells in a 12 well plate for 72hpi and then stained with 1% crystal violet.
